# Supplementary material
Source: HighWire-hosted journal article supplement (https://www.annfammed.org/highwire/filestream/13569/field_highwire_adjunct_files/0/Golembiewski_Supp_Figs.pdf)
Supplement: Golembiewski_Supp_Figs.pdf [file Golembiewski_Supp_Figs.pdf]

## Supplemental material for:

Golembiewski EH, Mainous III AG, Rahmanian KP, et al. An electronic tool to support patient-Centered Broad Consent: A Multi-Arm Randomized Clinical Trial in Family Medicine. *Ann Fam Med*. 2021;19(1):16-23.

## Supplemental Figure 1. Standard e-consent (no interactive links and no trust messages).

### Family Medicine Research Database

UF IRB-01 Approved Study ID: IRB201500678 Date Approved: \_\_\_\_\_ Expiration Date: \_\_\_\_\_

Family Medicine Research Database   

What is the purpose of this research?

If you decide to participate in this research database:

- Your health record information may be shared with researchers at the local university's hospital who would like to study it for research. Your health record information could include your name or other identifying information such as medical problems you have had, medications you have taken, and information you have shared with any of your doctors or nurses.

## Supplemental Figure 2. Interactive e-consent (standard e-consent with interactive, on-demand hyperlinks added to key terms).

### University of Florida

UF Family Medicine Research Database

UF IRB-01 Approved Study ID: IRB201602061 Date Approved: XX/XX/2017 Expiration Date: XX/XX/2018

#### Family Medicine Research Database

You have been informed about the possible review of your health record information for research. You have also been told of possible benefits and risks, and that you are free to not sign this form. You have received a copy of the information about the Family Medicine Research Database. You have been given the opportunity to contact the Institutional Review Board at the University of Florida to ask questions before you sign. If you have other questions in the future, you can ask them at any time.

You voluntarily agree to allow the collection, storage, and use of your health record information. You hereby authorize the collection, use and sharing of your [protected health information \(PHI\)](#) as described above. By signing this form, you are not waiving any of your legal rights.

If you would like, a PDF copy of all this information can be downloaded here: [PDF](#)

#### Protected Health Information (PHI)

close

Protected Health Information (PHI) is any information in your medical record that can be used to identify you as an individual and that was created, used, or disclosed in the process of you receiving a health care service, for example a doctor visit, diagnosis, or treatment. The University of Florida Privacy Office states that PHI is individually identifiable health information that is transmitted or maintained in any form or medium, for example paper or computer records.

**Supplemental Figure 3. Trust-enhanced e-consent (standard e-consent with interactive, on-demand hyperlinks added to key terms and additional trust messages).**

## Family Medicine Research Database

UF IRB-01 Approved Study ID: IRB201500678 Date Approved: \_\_\_\_\_ Expiration Date: \_\_\_\_\_

### Family Medicine Research Database

Before we get started, we would like to tell you a bit more about all of the processes and rules in place to keep your health records safe if they are used for research:

1. The [computer system](#) that contains your health record here at the local university's hospital has many levels of [security and safeguards](#) to keep unauthorized people from seeing your information.
2. Only researchers at the local university's hospital who have completed at least [three types of training](#) about protection of people and their health information can conduct studies on people. The researchers have to take this training again every few years.
3. No studies on people can be conducted at the local university's hospital without a thorough review of the ethics of the study and rigorous protection of the participants.
4. The local University's hospital does not allow any of the information in your health record to be seen by or sold to drug companies.
5. The information contained in your health record here at the local university's hospital cannot be shared with the U.S. government unless your name and personal information are removed, except under [very rare circumstances](#).

#### Computer System

close

The computer system includes many computers, computer programs, and employees that work together to keep your information safe. The local university's hospital and the government have rules that the computer system must follow to keep your information safe.

#### Security and Safeguards

close

The local university's hospital has computer security to keep your health information safe. The security includes:

1. Employees of the local university's hospital whose job is to protect health information that is stored in computer databases.
2. Rules that all employees of the local university's hospital must follow to protect health information that is stored in computer databases.
3. Computer programs that keep unauthorized people from seeing your health information, such as firewalls and virus protection.

#### Three Types of Training

close

The local university's hospital only permits researchers who have the proper professional experience and qualifications to conduct research. In addition, researchers at the local university's hospital are required to have regular training in protections of participant privacy in addition to federal, state, and university policies and regulations that protect research participants.
